# Supplementary material for: A Scottish provenance for the Altar Stone of Stonehenge
Source: PubMed Central journal article supplement (PMC11324516; doi:10.1038/s41586-024-07652-1), 2024-08-14
Supplement: 41586_2024_7652_MOESM2_ESM.pdf [file 41586_2024_7652_MOESM2_ESM.pdf]

## Reporting Summary

Nature Portfolio wishes to improve the reproducibility of the work that we publish. This form provides structure for consistency and transparency in reporting. For further information on Nature Portfolio policies, see our [Editorial Policies](#) and the [Editorial Policy Checklist](#).

Please do not complete any field with "not applicable" or n/a. Refer to the help text for what text to use if an item is not relevant to your study.

For final submission: please carefully check your responses for accuracy; you will not be able to make changes later.

### Statistics

For all statistical analyses, confirm that the following items are present in the figure legend, table legend, main text, or Methods section.

n/a | Confirmed

- The exact sample size ( $n$ ) for each experimental group/condition, given as a discrete number and unit of measurement
- A statement on whether measurements were taken from distinct samples or whether the same sample was measured repeatedly
- The statistical test(s) used AND whether they are one- or two-sided  
*Only common tests should be described solely by name; describe more complex techniques in the Methods section.*
- A description of all covariates tested
- A description of any assumptions or corrections, such as tests of normality and adjustment for multiple comparisons
- A full description of the statistical parameters including central tendency (e.g. means) or other basic estimates (e.g. regression coefficient) AND variation (e.g. standard deviation) or associated estimates of uncertainty (e.g. confidence intervals)
- For null hypothesis testing, the test statistic (e.g.  $F$ ,  $t$ ,  $r$ ) with confidence intervals, effect sizes, degrees of freedom and  $P$  value noted  
*Give  $P$  values as exact values whenever suitable.*
- For Bayesian analysis, information on the choice of priors and Markov chain Monte Carlo settings
- For hierarchical and complex designs, identification of the appropriate level for tests and full reporting of outcomes
- Estimates of effect sizes (e.g. Cohen's  $d$ , Pearson's  $r$ ), indicating how they were calculated

*Our web collection on [statistics for biologists](#) contains articles on many of the points above.*

### Software and code

Policy information about [availability of computer code](#)

**Data collection** Zircon, apatite and rutile U-Pb isotopic and trace element data were collected using an Agilent 8900 triple quadrupole mass spectrometer. Apatite Lu-Hf data was measured using an Agilent 8900 ICP-MS/MS. Further details of analytical set-up can be found in the Methods and Supplementary Information.

**Data analysis** For zircon, apatite and rutile U-Pb data reductions Iolite Version 4 (Paton et al 2011) and Isoplot R Version 6.2 (Vermeesch 2018) software were used. For zircon and rutile U-Pb data reduction the "U-Pb Geochronology" Data Reduction Scheme (DRS) was used in Iolite 4. Apatite trace element data was reduced using the "Trace Element" DRS in Iolite 4. Multidimensional scaling plots for zircon age datasets were created using the MATLAB script of Nordsvan et al. (2020), where MATLAB Version 9.11.0 (R2021b Update 2) was used. Apatite U-Pb isotopic data was reduced using the VizualAge UcomPbine DRS of Iolite Version 4. Apatite Lu-Hf ratios were calculate using the LADR software, Version 1.1.7.0 (Build date: 2021-11-03) (Norris & Danyushevsky, 2018) and Isoplot R.

For manuscripts utilizing custom algorithms or software that are central to the research but not yet described in published literature, software must be made available to editors and reviewers. We strongly encourage code deposition in a community repository (e.g. GitHub). See the Nature Portfolio [guidelines for submitting code & software](#) for further information.

## Data

Policy information about [availability of data](#)

All manuscripts must include a [data availability statement](#). This statement should provide the following information, where applicable:

- Accession codes, unique identifiers, or web links for publicly available datasets
- A description of any restrictions on data availability
- For clinical datasets or third party data, please ensure that the statement adheres to our [policy](#)

The authors declare that the isotopic and chemical data supporting the findings of this study are available within the paper and its supplementary information files (1-3).

## Research involving human participants, their data, or biological material

Policy information about studies with [human participants or human data](#). See also policy information about [sex, gender \(identity/presentation\), and sexual orientation](#) and [race, ethnicity and racism](#).

Reporting on sex and gender

Reporting on race, ethnicity, or other socially relevant groupings

Population characteristics

Recruitment

Ethics oversight

Note that full information on the approval of the study protocol must also be provided in the manuscript.

## Field-specific reporting

Please select the one below that is the best fit for your research. If you are not sure, read the appropriate sections before making your selection.

Life sciences  Behavioural & social sciences  Ecological, evolutionary & environmental sciences

For a reference copy of the document with all sections, see [nature.com/documents/nr-reporting-summary-flat.pdf](https://www.nature.com/documents/nr-reporting-summary-flat.pdf)

## Life sciences study design

All studies must disclose on these points even when the disclosure is negative.

Sample size

Data exclusions

Replication

Randomization

Blinding

## Reporting for specific materials, systems and methods

We require information from authors about some types of materials, experimental systems and methods used in many studies. Here, indicate whether each material, system or method listed is relevant to your study. If you are not sure if a list item applies to your research, read the appropriate section before selecting a response.

## Materials &amp; experimental systems

- n/a Involved in the study
- Antibodies
- Eukaryotic cell lines
- Palaeontology and archaeology
- Animals and other organisms
- Clinical data
- Dual use research of concern
- Plants

## Methods

- n/a Involved in the study
- ChIP-seq
- Flow cytometry
- MRI-based neuroimaging

## Palaeontology and Archaeology

## Specimen provenance

This work analysed two 30 µm polished thin sections of the Altar Stone, MS3 and 2010K.240. Both thin sections were prepared from rock fragments collected from Stonehenge, U.K. during archaeological digs of the Altar Stone during the 20th century and were loaned and sampled with permission of National Museum of Wales and Salisbury Museum. We also analysed two sections of Old Red Sandstone rock from the Orcadian Basin (CQ1 and AQ1). CQ1 is from Cruaday, Orkney (59°04'34.2" N, 3°18'54.6" W), and AQ1 is from near Spittal, Caithness (58°28'13.8" N, 3°27'33.6" W). Both Orcadian Basin geological rock samples were purchased from the UK company: Natural Wonders Ltd Registered office 20 Grape Lane, Whitby, YO22 4BA, North Yorkshire, Company Registration Number 05427798.

## Specimen deposition

MS3 and 2010K.240. were received on loan from National Museum of Wales and Salisbury Museum respectively.

## Dating methods

New dates are provided. We report in-situ zircon, apatite and rutile U-Pb ages (calculated as single-spot concordia ages) from MS3 and 2010K.240. From 2010K.240 we report apatite Lu-Hf ages. For Orcadian Basin samples we report apatite U-Pb ages.

Tick this box to confirm that the raw and calibrated dates are available in the paper or in Supplementary Information.

## Ethics oversight

Thin sections MS3 and 2010K.240 were analysed with permission of the National Museum of Wales and Salisbury Museum respectively.

Note that full information on the approval of the study protocol must also be provided in the manuscript.

## Plants

## Seed stocks

Not applicable

## Novel plant genotypes

Not applicable

## Authentication

Not applicable
