# Supplementary material for: A Scottish provenance for the Altar Stone of Stonehenge
Source: PubMed Central journal article supplement (PMC11324516; doi:10.1038/s41586-024-07652-1), 2024-08-14
Supplement: 41586_2024_7652_MOESM6_ESM.pdf [file 41586_2024_7652_MOESM6_ESM.pdf]

## Supplementary Information 4

A summary of analyses performed on each Altar Stone and Orcadian Basin sample.

*X denotes the analysis undertaken.*

### Altar Stone Samples

| Sample    | Automated Mineralogy | Zircon U-Pb | Rutile U-Pb | Apatite U-Pb | Apatite Lu-Hf | Apatite Trace Elements |
|-----------|----------------------|-------------|-------------|--------------|---------------|------------------------|
| MS3       | X                    | X           | X           | X            |               | X                      |
| 2010K.240 | X                    | X           |             |              | X             |                        |

### Orcadian Basin Samples

| Sample                   | Automated Mineralogy | Zircon U-Pb | Rutile U-Pb | Apatite U-Pb | Apatite Lu-Hf | Apatite Trace Elements |
|--------------------------|----------------------|-------------|-------------|--------------|---------------|------------------------|
| Spittal, Caithness (AQ1) | X                    |             |             | X            |               |                        |
| Cruaday, Orkney (CQ1)    | X                    |             |             | X            |               |                        |

## Supplementary Information 5 . Summary of Zircon U–Pb Reference Material

### Session 1 (MS3)

| Reference        | Primary Reference | Weighted Mean Age (Ma)* | $\pm 2\sigma$ | MSWD*                          | P*          | n         |
|------------------|-------------------|-------------------------|---------------|--------------------------------|-------------|-----------|
| <b>91500</b>     |                   | <b>1059</b>             | <b>10</b>     | <b>0.72</b>                    | <b>0.69</b> | <b>10</b> |
| Published age    | GJ1               | 1063.78                 | 0.65          | <i>Wiedenbeck et al., 1995</i> |             |           |
| <b>Plešovice</b> |                   | <b>336</b>              | <b>3</b>      | <b>0.69</b>                    | <b>0.78</b> | <b>15</b> |
| Published age    | GJ1               | 337.13                  | 0.37          | <i>Slama et al., 2008</i>      |             |           |
| <b>OG1</b>       |                   | <b>3468</b>             | <b>4</b>      | <b>0.73</b>                    | <b>0.75</b> | <b>16</b> |
| Published age    | GJ1               | 3465.40                 | 0.60          | <i>Stern et al., 2009</i>      |             |           |
| <b>Maniitsoq</b> |                   | <b>3014</b>             | <b>6</b>      | <b>0.65</b>                    | <b>0.85</b> | <b>17</b> |
| Published age    | GJ1               | 3008.70                 | 0.60          | <i>Marsh et al., 2019</i>      |             |           |

### Session 2 (2010K.240)

| Reference        | Primary Reference | Weighted Mean Age (Ma)* | $\pm 2\sigma$ | MSWD*                          | P*          | n         |
|------------------|-------------------|-------------------------|---------------|--------------------------------|-------------|-----------|
| <b>91500</b>     |                   | <b>1060</b>             | <b>3</b>      | <b>1.20</b>                    | <b>0.23</b> | <b>24</b> |
| Published age    | GJ1               | 1063.78                 | 0.65          | <i>Wiedenbeck et al., 1995</i> |             |           |
| <b>Plešovice</b> |                   | <b>338</b>              | <b>1</b>      | <b>1.20</b>                    | <b>0.27</b> | <b>18</b> |
| Published age    | GJ1               | 337.13                  | 0.37          | <i>Slama et al., 2008</i>      |             |           |
| <b>OG1</b>       |                   | <b>3466</b>             | <b>7</b>      | <b>0.78</b>                    | <b>0.79</b> | <b>29</b> |
| Published age    | GJ1               | 3465.40                 | 0.60          | <i>Stern et al., 2009</i>      |             |           |

\*Where MSWD and P are the mean square of the weighted deviation value and the associated MSWD age homogeneity test chi-squared P-value, both metrics are one-sided measurements.

Supplementary Information 6. KS Test Results. This KS test is two-sided (i.e. this test checks for any difference in distribution). The bottom half shows P-values (Highlighted green values are  $P>0.05$ ). The top table half shows the D-values (Highlighted in blue are the associated D-values for  $P>0.05$ ).

|                        | Altar Stone | East Avalonia | Laurentia | Ganderia | Megumia | West Avalonia | Armorica-Cadomia | Orcadian Basin | Anglo-Welsh Basin | Dingle Peninsula Basin | Midland Valley | Svalbard |
|------------------------|-------------|---------------|-----------|----------|---------|---------------|------------------|----------------|-------------------|------------------------|----------------|----------|
| Altar Stone            |             | 0.51          | 0.16      | 0.40     | 0.68    | 0.61          | 0.57             | 0.10           | 0.45              | 0.43                   | 0.32           | 0.13     |
| East Avalonia          | 0.00        |               | 0.53      | 0.12     | 0.21    | 0.15          | 0.18             | 0.50           | 0.28              | 0.21                   | 0.33           | 0.45     |
| Laurentia              | 0.10        | 0.00          |           | 0.42     | 0.71    | 0.63          | 0.60             | 0.23           | 0.47              | 0.45                   | 0.41           | 0.21     |
| Ganderia               | 0.00        | 0.00          | 0.00      |          | 0.29    | 0.24          | 0.18             | 0.39           | 0.29              | 0.27                   | 0.25           | 0.34     |
| Megumia                | 0.00        | 0.00          | 0.00      | 0.00     |         | 0.23          | 0.15             | 0.68           | 0.30              | 0.28                   | 0.50           | 0.63     |
| West Avalonia          | 0.00        | 0.00          | 0.00      | 0.00     | 0.00    |               | 0.22             | 0.61           | 0.25              | 0.21                   | 0.43           | 0.55     |
| Armorica-Cadomia       | 0.00        | 0.00          | 0.00      | 0.00     | 0.00    | 0.00          |                  | 0.57           | 0.26              | 0.25                   | 0.39           | 0.52     |
| Orcadian Basin         | 0.72        | 0.00          | 0.00      | 0.00     | 0.00    | 0.00          | 0.00             |                | 0.44              | 0.42                   | 0.37           | 0.11     |
| Anglo-Welsh Basin      | 0.00        | 0.00          | 0.00      | 0.00     | 0.00    | 0.00          | 0.00             | 0.00           |                   | 0.10                   | 0.26           | 0.35     |
| Dingle Peninsula Basin | 0.00        | 0.00          | 0.00      | 0.00     | 0.00    | 0.00          | 0.00             | 0.00           | 0.33              |                        | 0.25           | 0.37     |
| Midland Valley         | 0.00        | 0.00          | 0.00      | 0.00     | 0.00    | 0.00          | 0.00             | 0.00           | 0.00              | 0.00                   |                | 0.34     |
| Svalbard               | 0.36        | 0.00          | 0.00      | 0.00     | 0.00    | 0.00          | 0.00             | 0.06           | 0.00              | 0.00                   | 0.00           |          |

Supplementary Information 7 . KS Test Results, with Monte-Carlo resampling. This KS test is two-sided (i.e. this test checks for any difference in distribution). The bottom half of the table shows P-values (Highlighted green values are  $P>0.05$ ). The top half of the table shows two standard deviation values on the KS test P-value (highlighted blue values are two standard deviation values for those  $P>0.05$ ).

|                        | Altar Stone | East Avalonia | Laurentia | Ganderia | Megumia | West Avalonia | Armorica-Cadomia | Orcadian Basin | Anglo-Welsh Basin | Dingle Peninsula Basin | Midland Valley | Svalbard |
|------------------------|-------------|---------------|-----------|----------|---------|---------------|------------------|----------------|-------------------|------------------------|----------------|----------|
| Altar Stone            |             | 0.00          | 0.05      | 0.00     | 0.00    | 0.00          | 0.00             | 0.16           | 0.00              | 0.00                   | 0.00           | 0.10     |
| East Avalonia          | 0.00        |               | 0.00      | 0.00     | 0.00    | 0.00          | 0.00             | 0.00           | 0.00              | 0.00                   | 0.00           | 0.00     |
| Laurentia              | 0.11        | 0.00          |           | 0.00     | 0.00    | 0.00          | 0.00             | 0.00           | 0.00              | 0.00                   | 0.00           | 0.00     |
| Ganderia               | 0.00        | 0.00          | 0.00      |          | 0.00    | 0.00          | 0.00             | 0.00           | 0.00              | 0.00                   | 0.00           | 0.00     |
| Megumia                | 0.00        | 0.00          | 0.00      | 0.00     |         | 0.00          | 0.00             | 0.00           | 0.00              | 0.00                   | 0.00           | 0.00     |
| West Avalonia          | 0.00        | 0.00          | 0.00      | 0.00     | 0.00    |               | 0.00             | 0.00           | 0.00              | 0.00                   | 0.00           | 0.00     |
| Armorica-Cadomia       | 0.00        | 0.00          | 0.00      | 0.00     | 0.00    | 0.00          |                  | 0.00           | 0.00              | 0.00                   | 0.00           | 0.00     |
| Orcadian Basin         | 0.67        | 0.00          | 0.00      | 0.00     | 0.00    | 0.00          | 0.00             |                | 0.00              | 0.00                   | 0.00           | 0.03     |
| Anglo-Welsh Basin      | 0.00        | 0.00          | 0.00      | 0.00     | 0.00    | 0.00          | 0.00             | 0.00           |                   | 0.19                   | 0.00           | 0.00     |
| Dingle Peninsula Basin | 0.00        | 0.00          | 0.00      | 0.00     | 0.00    | 0.00          | 0.00             | 0.00           | 0.38              |                        | 0.00           | 0.00     |
| Midland Valley         | 0.00        | 0.00          | 0.00      | 0.00     | 0.00    | 0.00          | 0.00             | 0.00           | 0.00              | 0.00                   |                | 0.00     |
| Svalbard               | 0.33        | 0.00          | 0.00      | 0.00     | 0.00    | 0.00          | 0.00             | 0.06           | 0.00              | 0.00                   | 0.00           |          |

## Supplementary Information 8. Summary of Apatite U–Pb Reference Material

### Session 1 (MS3)

| Reference            | Primary Reference | Age (Ma)    | $\pm 2\sigma$ | MSWD*                                              | P*          | n         |
|----------------------|-------------------|-------------|---------------|----------------------------------------------------|-------------|-----------|
| <b>Otter Lake</b>    |                   | <b>926</b>  | <b>7</b>      | <b>1.7</b>                                         | <b>0.06</b> | <b>15</b> |
| Published age        | <b>MAD-1</b>      | 913         | 7             | <i>Barfod et al., 2005</i>                         |             |           |
| <b>FC-1</b>          |                   | <b>1109</b> | <b>16</b>     | <b>1.5</b>                                         | <b>0.08</b> | <b>17</b> |
| Published age        | <b>MAD-1</b>      | 1099.1      | 0.6           | <i>Schmitz et al., 2003</i>                        |             |           |
| <b>Mount McClure</b> |                   | <b>526</b>  | <b>8</b>      | <b>1.5</b>                                         | <b>0.10</b> | <b>17</b> |
| Published age        | <b>MAD-1</b>      | 523.5       | 1.5           | <i>Schoene et al., 2006; Thompson et al., 2012</i> |             |           |

### Session 2 (Orcadian Basin Samples CQ1 and AQ1)

| Reference            | Primary Reference | Age (Ma)    | $\pm 2\sigma$ | MSWD*                                              | P*          | n         |
|----------------------|-------------------|-------------|---------------|----------------------------------------------------|-------------|-----------|
| <b>Durango</b>       |                   | <b>28</b>   | <b>3</b>      | <b>0.55</b>                                        | <b>0.90</b> | <b>15</b> |
| Published age        | <b>MAD-1</b>      | 31.44       | 0.18          | <i>McDowell et al., 2005</i>                       |             |           |
| <b>FC-1</b>          |                   | <b>1088</b> | <b>12</b>     | <b>1.4</b>                                         | <b>0.13</b> | <b>17</b> |
| Published age        | <b>MAD-1</b>      | 1099.1      | 0.6           | <i>Schmitz et al., 2003</i>                        |             |           |
| <b>Mount McClure</b> |                   | <b>527</b>  | <b>5</b>      | <b>0.6</b>                                         | <b>0.86</b> | <b>16</b> |
| Published age        | <b>MAD-1</b>      | 523.5       | 1.5           | <i>Schoene et al., 2006; Thompson et al., 2012</i> |             |           |

\*Where MSWD and P are the mean square of the weighted deviation value and the associated MSWD age homogeneity test chi-squared P-value, both metrics are one-sided.
